# Supplementary material for: Bioinspired multilayer membranes as potential adhesive patches for skin wound healing
Source: Royal Society of Chemistry journal article supplement (doi:10.1039/c8bm00319j), 2018-01-01
Supplement: c8bm00319j1.pdf [file c8bm00319j1.pdf]

## Electronic Supplementary Information

### Bioinspired multilayer membranes as potential adhesive patch for skin wound healing

Maria P. Sousa<sup>a</sup>, Ana I. Neto<sup>b,c</sup>, Tiago R. Correia<sup>d</sup>, Sónia P. Miguel<sup>d</sup>, Michiya Matsusaki<sup>e</sup>,

Ilídio J. Correia<sup>d</sup>, João F. Mano<sup>a,b,c,\*</sup>

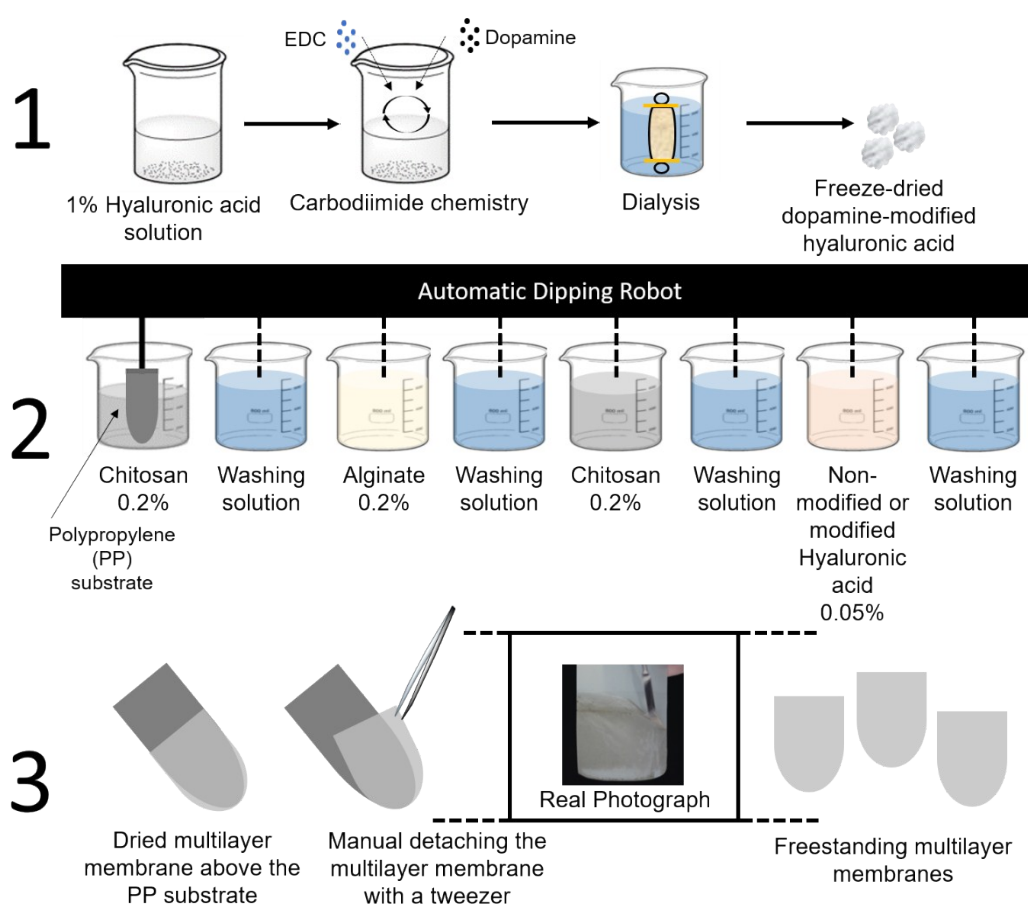

Figure S1. Schematic representation of the synthesis of the conjugated HA-DN (1), the layer-by-layer assembly using the dipping robot equipment (2) and finally the detachment method employed to obtain the freestanding multilayer membrane (3). A real photograph of the detachment step of the [CHT/ALG/CHT/HA-DN]<sub>100</sub> multilayer membrane is also presented.

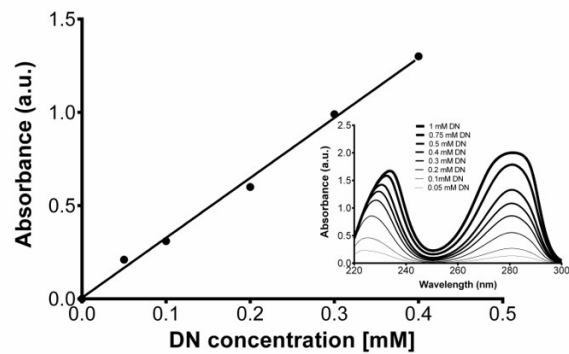

Figure S2. Inset shows the UV-Vis spectra of dopamine solutions with different concentrations and the figure represents the respective calibration curve that correlates DN concentration with measured absorbance.

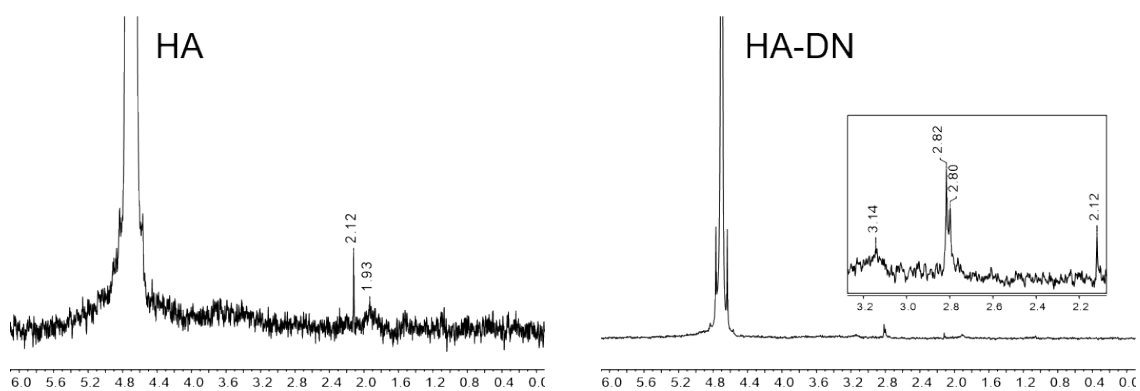

Figure S3. <sup>1</sup>H-NMR spectra of HA and the synthesized conjugate HA-DN.
